# Supplementary material for: Effects of Therapy on Urine Neutrophil Gelatinase-Associated Lipocalin in Nondiabetic Glomerular Diseases with Proteinuria
Source: Hindawi journal article supplement (doi:10.1155/2016/4904502), 2016-01-01
Supplement: f1 [file 4904502.f1.pdf]

**Supplementary Table 1: Laboratory parameters according to remission status at follow-up**

| Parameters           | Status at follow-up       |                          |                      | P value          | P value          |
|----------------------|---------------------------|--------------------------|----------------------|------------------|------------------|
|                      | Complete Remission (n=10) | Partial Remission (n=16) | Resistant (n=17)     | PR vs. Resist    | PR vs. CR        |
| UPCR <sub>1</sub>    | 2.50<br>(0.54---9.23)     | 3.35<br>(1.45-9.15)      | 1.02<br>(0.54-6.60)  | 0.056            | 0.44             |
| UPCR <sub>2</sub>    | 0.15<br>(0.06-0.26)       | 0.80<br>(0.31-3.04)      | 1.62<br>(0.34-16.96) | <b>0.023</b>     | <b>&lt;0.001</b> |
| GFR <sub>1</sub>     | 79<br>(54-137)            | 56<br>(12.3-143)         | 66<br>(25-143)       | 0.38             | 0.12             |
| GFR <sub>2</sub>     | 97<br>(71-130)            | 50<br>(12-130)           | 60<br>(12-140)       | 0.38             | 0.12             |
| NGAL <sub>1</sub>    | 29.3<br>(16.7-213.0)      | 24.6<br>(5.0-103.2)      | 23.2<br>(2.9-120.3)  | 0.86             | 1.0              |
| NGAL <sub>2</sub>    | 7.4<br>(1.6-66.0)         | 25.4<br>(2.9-139.2)      | 23.5<br>(0.5-359.7)  | 0.86             | 1.0              |
| ΔUPCR <sub>2-1</sub> | -2.28<br>(-9.03- -0.48)   | -2.12<br>(-6.44 --0.93)  | 0.01<br>(-1.78-14.1) | <b>&lt;0.001</b> | <b>&lt;0.001</b> |
| Δ GFR <sub>2-1</sub> | +13.0<br>(-21.2-35.0)     | -3.4<br>(-39.2-41.4)     | -2.6<br>(-26.5-71.7) | 0.86             | 0.44             |
| ΔNGAL <sub>2-1</sub> | -15.2<br>(-211.4-33.7)    | 2.2<br>(-77.3-115.8)     | 3.9<br>(-31.8-289.3) | 0.86             | <b>0.046</b>     |

Data as median (min-max).

Subscript 1 denotes baseline and subscript 2 denotes follow-up. Δ denotes change from baseline to follow-up (Follow-up minus baseline).

UPCR, Urine protein creatinine (g per g creatinine); GFR, glomerular filtration rate (ml/min/1.73m<sup>2</sup>); NAGL, urine Neutrophil Gelatinase-Associated Lipocalin (ng/ml); CR, complete remission; PR, partial remission; Resist, Resistant
